# Supplementary material
Source: PubMed Central journal article supplement (PMC2576087)
Supplement: 90309.2008_1.pdf [file 90309.2008_1.pdf]

**Supplemental Material for:**

**Intermittent preferred food access reduces the reinforcing efficacy of chow in rats**

Pietro Cottone<sup>1,2,3,\*</sup>; Valentina Sabino,<sup>1,2,\*</sup>; Luca Steardo<sup>3</sup>; Eric P. Zorrilla<sup>1,2</sup>

<sup>1</sup>Committee on the Neurobiology of Addictive Disorders (CNAD), <sup>2</sup>Harold L. Dorris Neurological Research Institute, The Scripps Research Institute, 10550 N. Torrey Pines Rd. La Jolla, California, 92037, USA

<sup>3</sup>Department of Human Physiology and Pharmacology, University of Rome La Sapienza, Rome, Italy

\*These authors equally contributed to this work.

**Running title:** Reduced reinforcing efficacy of less preferred food

**Supplementary materials:** 2 Supplemental Figures, 1 Supplemental Table and Supplemental Legends

Correspondence and requests for materials should be addressed to:

Pietro Cottone (Email: [cottone@scripps.edu](mailto:cottone@scripps.edu))  
Committee on the Neurobiology of Addictive Disorders, SP30-2400  
The Scripps Research Institute  
10550 N. Torrey Pines Road  
La Jolla, CA 92037 USA  
Phone: 858-784-7464  
Fax: 858-784-7405

or

Eric P. Zorrilla (Email: [ezorrilla@scripps.edu](mailto:ezorrilla@scripps.edu))  
Committee on the Neurobiology of Addictive Disorders, SP30-2400  
The Scripps Research Institute  
10550 N. Torrey Pines Road  
La Jolla, CA 92037 USA  
Phone: 858-784-7416  
Fax: 858-784-7405

## Supplemental Figure 1

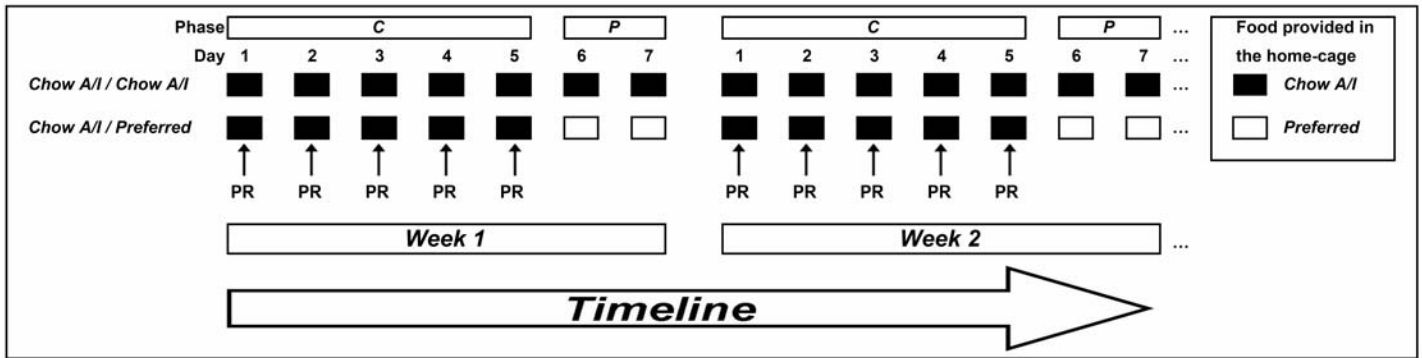

Schematic of the experimental design used in this study. Rats were assigned to two groups, matched for food intake, body weight, and baseline progressive ratio performance. One group was provided with chow diet (“Chow A/I”) *ad libitum* 7 days per week (*Chow A/I / Chow A/I*), and a second group was provided chow *ad libitum* for 5 days each week followed by 2 days of *ad libitum* access to the highly preferred chocolate flavored, high-sucrose diet (“Preferred”) (*Chow A/I / Preferred*). The first 5 days (Chow A/I only) and last 2 days (Chow A/I or Preferred according to experimental group) of each week are referred to in all experiments as *C* and *P* phases. Diets were never concurrently available. Progressive ratio (PR) sessions were performed daily during *C* phases.

Supplemental Figure 2

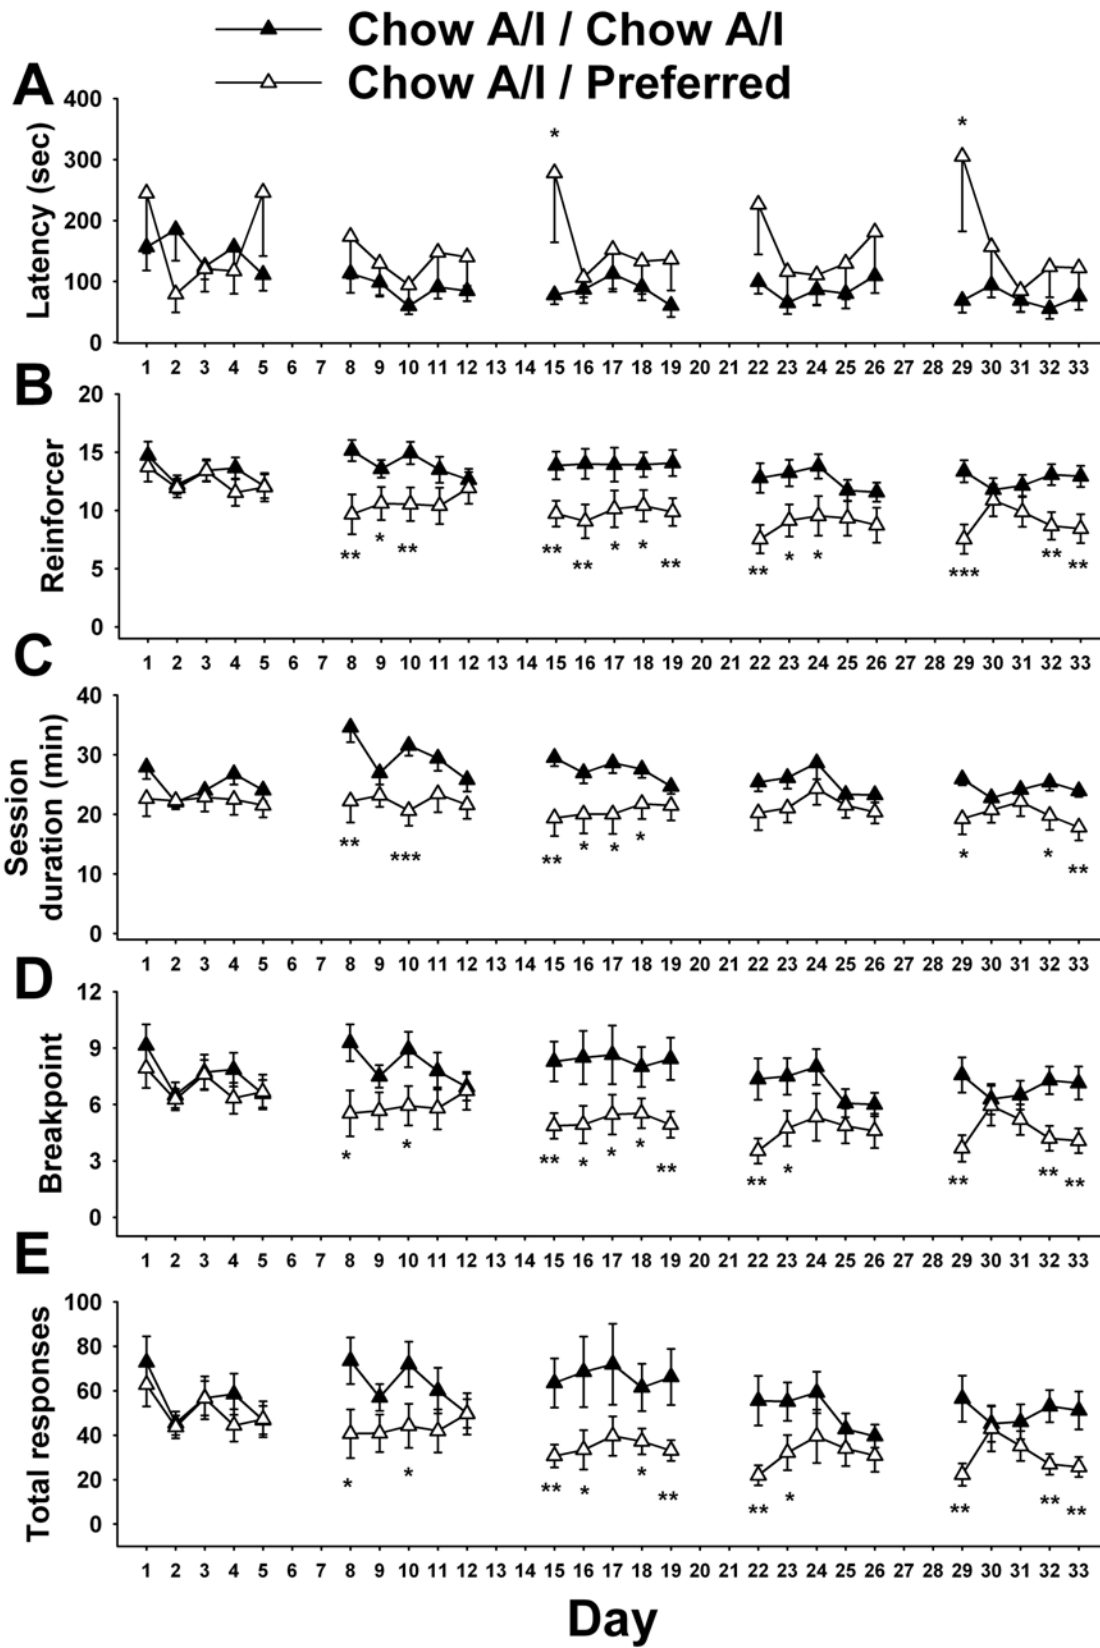

Effects of repeated cycles of 5-day access to Chow A/I alternated by 2-day access to either Chow A/I (*Chow A/I / Chow A/I*,  $n=14$ ) or highly preferred chocolate-flavored sugary diet (*Chow A/I /Preferred*,  $n=15$ ) on progressive ratio responding for Chow A/I pellets in male Wistar rats. Rats were tested daily at the dark cycle onset during the *C (Chow A/I) Phase*. Panels show  $M\pm SEM$  (**A**) Latency, the interval from the time the rat was placed into the test chamber until the time it earned its first reinforcer, (**B**) Reinforcers, total number of reinforced responses, (**C**) Session duration, the time between completion of the first ratio and the end of the session, (**D**) Breakpoint, the last ratio completed by a subject prior to the end of the session, (**E**) Total responses, the number of reinforced and non-reinforced responses. Latency and Session duration are shown as backtransformed  $M-SEM$  to facilitate interpretation. \*differs from *Chow A/I / Chow A/I*  $p<0.05$ , \*\* $p<0.01$ , \*\*\* $p<0.001$ .

## Supplemental Table 1

**Supplemental Table 1. Diet composition and energy density**

|                                  | <b>Chow</b>                                                                                                                                                                                                                                                                                                                                                                                                                                                                                                                                                                                                                                                                                                                | <b>Chow A/I</b>                                                                                                                                                                                                                                                                                                                                                                                                                                                                                                                                                                                                                                                                                                                                                                                                                                                                       | <b>Preferred</b>                                                                                                                                                                    |
|----------------------------------|----------------------------------------------------------------------------------------------------------------------------------------------------------------------------------------------------------------------------------------------------------------------------------------------------------------------------------------------------------------------------------------------------------------------------------------------------------------------------------------------------------------------------------------------------------------------------------------------------------------------------------------------------------------------------------------------------------------------------|---------------------------------------------------------------------------------------------------------------------------------------------------------------------------------------------------------------------------------------------------------------------------------------------------------------------------------------------------------------------------------------------------------------------------------------------------------------------------------------------------------------------------------------------------------------------------------------------------------------------------------------------------------------------------------------------------------------------------------------------------------------------------------------------------------------------------------------------------------------------------------------|-------------------------------------------------------------------------------------------------------------------------------------------------------------------------------------|
| <b>Manufacturer</b>              | Harlan-Teklad                                                                                                                                                                                                                                                                                                                                                                                                                                                                                                                                                                                                                                                                                                              | TestDiet                                                                                                                                                                                                                                                                                                                                                                                                                                                                                                                                                                                                                                                                                                                                                                                                                                                                              | TestDiet                                                                                                                                                                            |
| <b>Code</b>                      | LM-485 Diet 7012                                                                                                                                                                                                                                                                                                                                                                                                                                                                                                                                                                                                                                                                                                           | 5TUM                                                                                                                                                                                                                                                                                                                                                                                                                                                                                                                                                                                                                                                                                                                                                                                                                                                                                  | 5TUL (chocolate-flavored)                                                                                                                                                           |
| <b>Macronutrient composition</b> | Kcal%                                                                                                                                                                                                                                                                                                                                                                                                                                                                                                                                                                                                                                                                                                                      | Kcal%                                                                                                                                                                                                                                                                                                                                                                                                                                                                                                                                                                                                                                                                                                                                                                                                                                                                                 | Kcal%                                                                                                                                                                               |
| Protein                          | 21                                                                                                                                                                                                                                                                                                                                                                                                                                                                                                                                                                                                                                                                                                                         | 24.1                                                                                                                                                                                                                                                                                                                                                                                                                                                                                                                                                                                                                                                                                                                                                                                                                                                                                  | 20.5                                                                                                                                                                                |
| Carbohydrate                     | 66                                                                                                                                                                                                                                                                                                                                                                                                                                                                                                                                                                                                                                                                                                                         | 65.5                                                                                                                                                                                                                                                                                                                                                                                                                                                                                                                                                                                                                                                                                                                                                                                                                                                                                  | 66.8                                                                                                                                                                                |
| Fat                              | 13                                                                                                                                                                                                                                                                                                                                                                                                                                                                                                                                                                                                                                                                                                                         | 10.4                                                                                                                                                                                                                                                                                                                                                                                                                                                                                                                                                                                                                                                                                                                                                                                                                                                                                  | 12.7                                                                                                                                                                                |
| <b>Kcal/g</b>                    | 3.41                                                                                                                                                                                                                                                                                                                                                                                                                                                                                                                                                                                                                                                                                                                       | 3.30                                                                                                                                                                                                                                                                                                                                                                                                                                                                                                                                                                                                                                                                                                                                                                                                                                                                                  | 3.48                                                                                                                                                                                |
| <b>Ingredients</b>               | Ground corn, dehulled soybean meal, ground oats, wheat middlings, dehydrated alfalfa meal, soybean oil, corn gluten meal, calcium carbonate, dicalcium phosphate, brewers dried yeast, iodized salt, choline chloride, magnesium oxide, L-lysine, DL-methionine, vitamin A acetate, vitamin D3 supplement, vitamin E supplement, niacin, calcium pantothenate, riboflavin, thiamine mononitrate, pyridoxine hydrochloride, menadione sodium bisulfite complex (source of vitamin K activity), folic acid, biotin, vitamin B12 supplement, calcium carbonate, manganous oxide, ferrous sulfate, copper sulfate, zinc oxide, calcium iodate, cobalt carbonate, chromium potassium sulfate, locust bean gum, gelatin, kaolin. | LabDiet #5001 Rodent Diet (ground corn, dehulled soybean meal, dried beet pulp, fish meal, ground oats, brewers dried yeast, cane molasses, dehydrated alfalfa meal, dried whey, wheat germ, porcine animal fat preserved with BHA, porcine meat meal, wheat middlings, salt, calcium carbonate, soybean oil, corn gluten meal, calcium carbonate, DL-methionine, choline chloride, cholecalciferol, vitamin A acetate folic acid, menadione sodium bisulfite complex (source of vitamin K), pyridoxine hydrochloride, thiamine mononitrate, nicotinic acid, calcium pantothenate, dl-alpha tocopheryl acetate, cyanocobalamin, riboflavin, ferrous sulfate, manganous oxide, zinc oxide, ferrous carbonate, copper sulfate, zinc sulfate, calcium iodate, cobalt carbonate, sodium selenite), corn syrup, silicon dioxide, inert binder, color and/or flavor added where applicable. | Sucrose, casein, maltodextrin, corn starch, corn oil, cellulose, minerals, silicon dioxide, vitamin, magnesium stearate, DL-methionine, color and/or flavor added where applicable. |

Diet specifications are available on line: Harlan LM-485 (*Regular Chow*;  
<http://www.teklad.com/standardrodentdiet/r7012.asp>), 5TUM Diet (*Chow A/I*;

<http://www.testdiet.com/PDF/5TUM.pdf>), and 5TUL Chocolate Diet (*Preferred*;  
<http://www.testdiet.com/PDF/5TUL.pdf>).
